# Supplementary material for: Analysis of Human Performance Deficiencies Associated With Surgical Adverse Events
Source: PubMed Central journal article supplement (PMC6669897; doi:10.1001/jamanetworkopen.2019.8067), 2019-07-31
Supplement: jamanetwopen-2-e198067-s001.pdf [file jamanetwopen-2-e198067-s001.pdf]

## Supplementary Online Content

Suliburk JW, Buck QM, Pirko CJ, et al. Analysis of human performance deficiencies associated with surgical adverse events. *JAMA Netw Open*. 2019;2(7):e198067. doi:10.1001/jamanetworkopen.2019.8067

**eTable 1.** Incidence of Single vs Multiple HPDs

**eTable 2.** Associations of HPDs in Multi-HPD Adverse Events

**eTable 3.** Primary and Secondary HPD Association Patterns

**eFigure 1.** PRISMA Diagram of Literature Analysis

**eFigure 2.** Examples for Classification of Human Performance Deficiencies

**eFigure 3.** Example of Human Performance Deficiency (HPD) Classifier Tool

This supplementary material has been provided by the authors to give readers additional information about their work.

**eTable 1.** Incidence of Single vs Multiple HPDs

| Human Performance Deficiency Classification | Cases with Single HPDs (n = 53) <sup>a</sup> | Cases with Multiple HPDs (n = 53) <sup>a</sup> | Total HPDs         |
|---------------------------------------------|----------------------------------------------|------------------------------------------------|--------------------|
| <b>Class I: Planning/Problem Solving</b>    | <b>12</b>                                    | <b>43</b>                                      | <b>55</b>          |
| A. Active mistakes                          | 12                                           | 36                                             | 48                 |
| 1. Guideline/protocol misapplication        | 0                                            | 3                                              | 3                  |
| 2. Knowledge deficit                        | 0                                            | 7                                              | 7                  |
| 3. Cognitive bias                           | 12                                           | 26                                             | 38                 |
| i. Diagnostic                               | 3                                            | 10                                             | 13                 |
| ii. Treatment                               | 9                                            | 16                                             | 25                 |
| B. Latent mistakes                          | 0                                            | 7                                              | 7                  |
| <b>Class II: Execution</b>                  | <b>37</b>                                    | <b>61</b>                                      | <b>98</b>          |
| A. Lack of recognition                      | 13                                           | 23                                             | 36                 |
| B. Lack of attention                        | 4                                            | 18                                             | 22                 |
| C. Memory lapse                             | 0                                            | 3                                              | 3                  |
| D. Technical error                          | 20                                           | 17                                             | 37                 |
| <b>Class III: Rules Violation</b>           | <b>0</b>                                     | <b>6</b>                                       | <b>6</b>           |
| A. Ignoring routine/cutting corners         | 0                                            | 2                                              | 2                  |
| B. Optimizing/personal gain                 | 0                                            | 1                                              | 1                  |
| C. Situational/time pressure                | 0                                            | 3                                              | 3                  |
| <b>Class IV: Communication</b>              | <b>4</b>                                     | <b>20</b>                                      | <b>24</b>          |
| A. Absent                                   | 3                                            | 10                                             | 13                 |
| B. Assumed                                  | 1                                            | 7                                              | 8                  |
| C. Misinterpreted                           | 0                                            | 3                                              | 3                  |
| <b>Class V: Teamwork</b>                    | <b>0</b>                                     | <b>9</b>                                       | <b>9</b>           |
| A. Ill-defined roles/lack of leadership     | 0                                            | 3                                              | 3                  |
| B. Lack of team expertise                   | 0                                            | 2                                              | 2                  |
| C. Failure to evaluate progress             | 0                                            | 4                                              | 4                  |
| <b>Total Human Performance Deficiencies</b> | <b>53</b>                                    | <b>139</b>                                     | <b>192 (100)**</b> |

<sup>a</sup>The number of adverse event cases with single or multiple HPDs

\*\*106 HPD cases noted in column heads is exceeded by 192 HPDs detailed in chart because of the occurrence of two or more HPDs in some adverse event cases (i.e., 1.8 HPDs/adverse event case with HPD).

**eTable 2.** Associations of HPDs in Multi-HPD Adverse Events

|                                           | <b>Associated HPD Major Category</b> | <b>Associated HPD Sub- category (n)</b>                                              |
|-------------------------------------------|--------------------------------------|--------------------------------------------------------------------------------------|
| <b>Class I: Planning/Problem Solving:</b> |                                      |                                                                                      |
| A. Active mistakes                        |                                      |                                                                                      |
| 1. Guideline/protocol misapplication      | Class I, II                          | IA2, IA3ii (2), IIB, IID, IIB                                                        |
| 2. Knowledge deficit                      | Class I, II, IV, V                   | IA1, IA3i (2), IA3ii (2), IIA (3), IID, IVA, VC                                      |
| 3. Cognitive bias                         |                                      |                                                                                      |
| i. Diagnostic                             | Class I, II, III                     | IA2 (2), IA3ii (3), IIB, IIA(3), IID(2), IIIA, IIIC                                  |
| ii. Treatment                             | Class I, II, IV, V                   | IA1(2), IA2 (2), IA3i (3), IIA (2), IIB (2), IID (6), IVB, VB, VC                    |
| B. Latent mistakes                        | Class II, III, IV                    | IIA (4), IIB (4), IIC, IID, IIIB, IIIC, IVA IVB (3), IVC                             |
| <b>Class II: Execution</b>                |                                      |                                                                                      |
| A. Lack of recognition                    | Class I, II, IV, V                   | IA2 (3), IA3i (3), IA3ii (2), IB (4), IIB (5), IIC, IID (5), IVA(3), IVB, VA, VC (3) |
| B. Lack of attention                      | Class I, II, IV, V                   | IA1, IA3i, IA3ii (2), IB (4), IIA(5), IIC, IVA, IVB (2) IVC, VA, VC (3)              |
| C. Memory lapse                           | Class I, II                          | IB, IIA, IIB                                                                         |
| D. Technical error                        | Class I, II, V                       | IA1, IA2, IA3i (2), IB, IA3ii (6), IIA (5) VB,                                       |
| <b>Class III: Rules Violation</b>         |                                      |                                                                                      |
| A. Ignoring Routine / cutting corners     | Class I,III, IV, V                   | IA3i, IIIC, IVA, VA,                                                                 |
| B. Optimizing/personal gain               | Class I                              | IB                                                                                   |
| C. Necessary/situational                  | Class I, III                         | IA3i, IB, IIIA                                                                       |
| <b>Class IV: Communication</b>            |                                      |                                                                                      |
| A. Absent                                 | Class I, II, III IV, V               | IA2, IB, IIA(3), IIB (2), IIIA, IVC, VA                                              |
| B. Assumed                                | Class I, II, IV                      | IA3ii, IB (3), IIA, IIB (2), IVC                                                     |
| C. Misinterpreted                         | Class I, II, IV                      | IB, IIB, IVA,                                                                        |
| <b>Class V. Teamwork</b>                  |                                      |                                                                                      |
| A. Ill-defined roles/lack of leadership   | Class II, III, IV                    | IIA, IIB, IIIA, IVA                                                                  |
| B. Lack of group expertise                | Class I, II                          | IA3ii, IID                                                                           |
| C. Failure to evaluate progress           | Class I, II                          | IA2, IA3ii, IIA (3), IIB(3),                                                         |

**eTable 3. Primary and Secondary HPD Association Patterns**

| Primary HPD (n)                                                                                                                                                                                                                                 | Secondary HPD Major Category (n)                           | Secondary HPD Sub-Category (n)                                               |
|-------------------------------------------------------------------------------------------------------------------------------------------------------------------------------------------------------------------------------------------------|------------------------------------------------------------|------------------------------------------------------------------------------|
| <b>Class I: Planning/Problem Solving - 29</b><br>A. Active mistakes (23)<br>1. Guideline/protocol misapplication (3)<br>2. Knowledge deficit (5)<br>3. Cognitive bias (15)<br>i. Diagnostic (5)<br>ii. Treatment (10)<br>B. Latent mistakes (6) | Class II (2)<br>Class I (2)                                | IID (1), IIB (1)<br>IA3ii (1), IA2 (1)                                       |
|                                                                                                                                                                                                                                                 | Class II (4)<br>Class I (4)<br>Class IV (1)<br>Class V (1) | IIA (3), IID (1)<br>IA3i (2), IA3ii (1), IB (1)<br>IVA (1)<br>VC (1)         |
|                                                                                                                                                                                                                                                 | Class II (6)<br>Class III (2)<br>Class I (5)               | IIA (2), IIB (1), IID (3)<br>IIIA (1), IIIC (1)<br>IA3ii (3), IA3i (2)       |
|                                                                                                                                                                                                                                                 | Class II (9)<br>Class V (2)<br>Class IV (1)<br>Class I (2) | IID (5), IIA (2), IIB (2)<br>VB (1), VC (1)<br>IVB (1)<br>IA2 (1)            |
|                                                                                                                                                                                                                                                 | Class II (10)<br>Class IV (5)<br>Class III (2)             | IIA (4), IIB (5), IIC (1)<br>IVA (1), IVB (3), IVC (1)<br>IIIB (1), IIIC (1) |
|                                                                                                                                                                                                                                                 | Class II (11)<br>Class IV (3)<br>Class I (1)               | IIB (5), IID (5), IIC (1)<br>IVA (2), IVB (1)<br>IA3i (1)                    |
|                                                                                                                                                                                                                                                 | Class IV (5)<br>Class V (2)<br>Class II (1)                | IVA (3), IVB (1), IVC (1)<br>VA (1), VC (1)<br>IIC (1)                       |
| A. Lack of recognition (12)                                                                                                                                                                                                                     | -                                                          | VB (1), VC (1)<br>IA3ii (1)                                                  |
|                                                                                                                                                                                                                                                 | Class V (2)<br>Class I (1)                                 | VB (1), VC (1)<br>IA3ii (1)                                                  |
| B. Lack of attention (4)                                                                                                                                                                                                                        | -                                                          | -                                                                            |
| C. Memory lapse (0)                                                                                                                                                                                                                             | -                                                          | -                                                                            |
| D. Technical error (2)                                                                                                                                                                                                                          | -                                                          | -                                                                            |
| <b>Class III: Rules Violation - 1</b><br>A. Ignoring Routine / cutting corners (1)<br><br>B. Optimizing/personal gain (0)<br>C. Necessary/situational (0)                                                                                       | Class IV (1)<br>Class III (1)<br>Class V (1)               | IVA (1)<br>IIIC (1)<br>VA (1)                                                |
|                                                                                                                                                                                                                                                 | -                                                          | -                                                                            |
|                                                                                                                                                                                                                                                 | -                                                          | -                                                                            |
| <b>Class IV: Communication - 3</b><br>A. Absent (2)<br>B. Assumed (1)<br>C. Misinterpreted (0)                                                                                                                                                  | Class V (1)                                                | VA (1)                                                                       |
|                                                                                                                                                                                                                                                 | Class IV                                                   | IVC (1)                                                                      |
|                                                                                                                                                                                                                                                 | -                                                          | -                                                                            |
| <b>Class V: Teamwork - 0</b><br>A. Ill-defined roles/lack of leadership (0)<br>B. Lack of group expertise (0)<br>C. Failure to evaluate progress (0)                                                                                            | -                                                          | -                                                                            |
|                                                                                                                                                                                                                                                 | -                                                          | -                                                                            |
|                                                                                                                                                                                                                                                 | -                                                          | -                                                                            |

eTable 3 Legend: Primary HPD (orange) column depicts incidence of HPD as the “driving” causative source of clustered (secondary) HPDs in corresponding row. Secondary HPD (turquoise) column depicts frequency at which an HPD was driven by a primary HPD (depicted in orange column of corresponding row)

**eFigure 1.** PRISMA Diagram of Literature Analysis

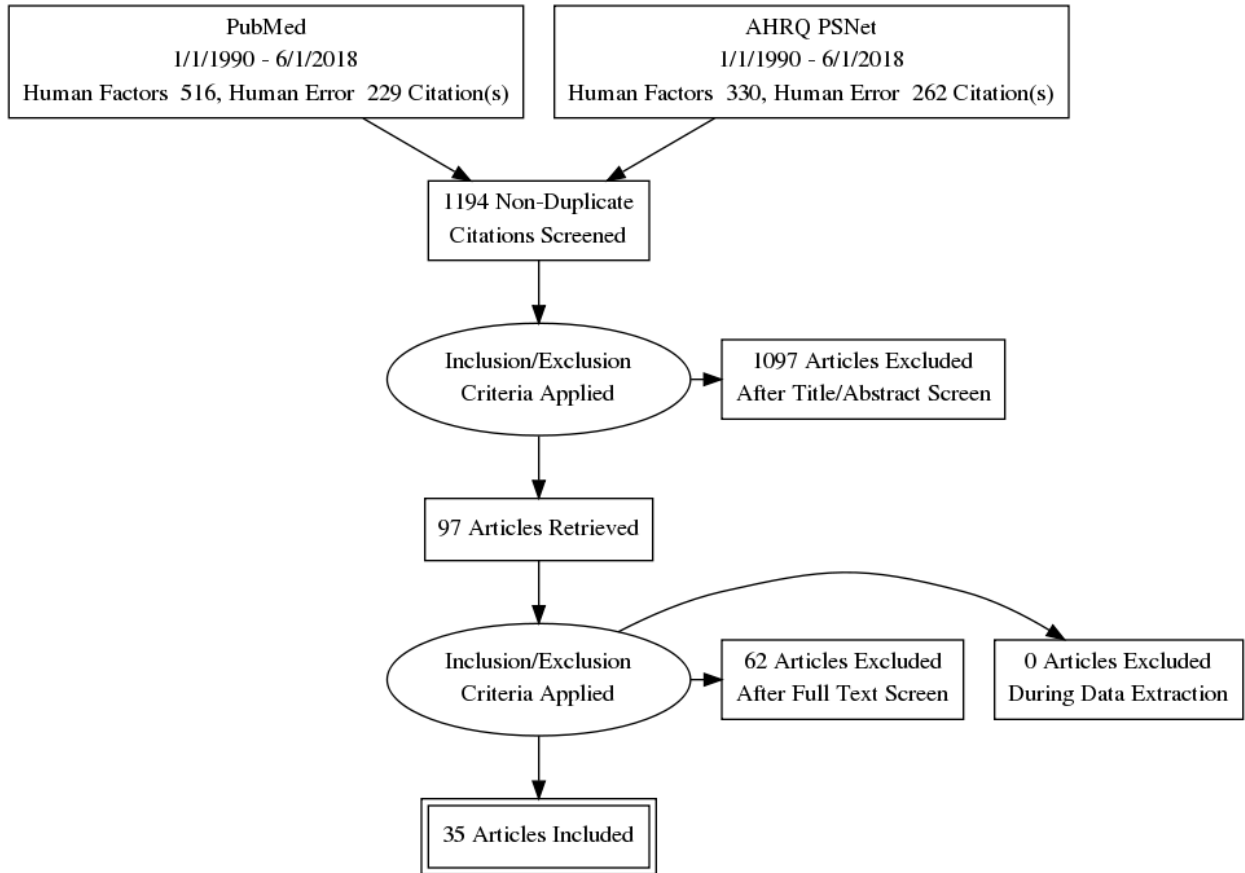

Schematic of systematic review performed using PRISMA guidelines in the synthesis and development of a human performance deficiency (HPD) Classifier Tool.

## eFigure 2. Examples for Classification of Human Performance Deficiencies

### Human Factors Classification (Examples):

**Planning/Problem Solving** (confirmation bias, rush to comply, false pattern matching, bias toward action)

A. **Active Mistake** (Proximate cause identifiable with near-immediate consequence)

i. **Rule based mistakes** ("Rule/Protocol" meaning a learned sequence of thoughts or actions meant to address a certain situation)

E.g. - "All free air needs an exploratory laparotomy no matter what" (Bad protocol)  
- "Start chest compressions if no pulse in code", but patient just had open heart surgery (Good protocol, wrong situation)

ii. **Knowledge based mistakes** (Novel situation for which previously learned rules/protocols don't work, so have to think of *de novo* solution, but have either incorrect or insufficient base of knowledge or inaccurate logical reasoning)

E.g. - Hypotensive patient with atrial fibrillation given epinephrine as a pressor, but chronotropic effect prompts rapid ventricular response and subsequent decompensation

iii. **Cognitive Bias in Diagnosis**

a. Over-attachment to a Diagnosis (E.g. Patient with BRBPR keeps getting exams/treatment for hemorrhoids, delaying colon cancer diagnosis)

b. Availability Bias (E.g. Aortic surgeon assumes new back pain is an acute aortic dissection and doesn't diagnose acute pancreatitis)

c. Diagnostic Momentum (E.g. Postoperative patient with chest pain and dyspnea transferred to ICU with concern for acute MI, so no workup for pulmonary embolism performed)

iv. **Cognitive Bias in Treatment Decisions**

a. Commission Bias (E.g. Poor surgical candidate taken for elective ventral hernia repair for symptomatic relief, but malnutrition and poor postoperative healing lead to enterocutaneous fistula)

b. Omission Bias (E.g. Stable cirrhotic patient with incarcerated umbilical hernia isn't taken to OR due to risk of operation, but later perforates and is now too sick for intervention)

B. **Latent Mistake (System factors or leadership decisions create a vulnerability which usually lies dormant but was exposed by "perfect storm" of previously unforeseen factors leading to adverse event;**

E.g. - Similar color and font labeling on 1:100 and 1:1000 Epi syringes that are stored next to each other

**Execution Errors** (slips, lapses, fumbles, attention deficit, distraction, situational awareness)

A. **Recognition error** (misidentified abnormal patient condition, lab, anatomy, or technical surgical situation)

B. **Attention error** (missed lab, lapsed OR timeout, inattention to anesthesia management)

C. **Memory error** (forgot to write order, forgot patient-specific aberrancy)

D. **Technical skill/Insufficient Practice** (Needle travels too deep during fascial closure, causing enterotomy)

**Rules Violation** (Conscious decision to deviate from safe operating practice, expecting adverse consequences would be avoided)

A. **Routine** ("Cutting corners")

B. **Optimizing/Personal Gain** (Missing afternoon rounds to study or sleep)

C. **Necessary/Situational** (Violation seems to offer only path available or rules seen as inappropriate to situation)

D. **Time Pressure** (Rushing to finish notes, so don't include or edit pertinent details)

**Communication**

A. **Absent** (Didn't sign out patient's cardiac history)

B. **Assumed** (Intern assumes chief resident meant to give patient double dose of anticoagulant)

C. **Misinterpreted** (Both teams think the other is primary, so no orders get placed)

**Teamwork/Group Trap** (collective decision/plan is erroneous)

A. **Lack of leadership** in group meeting (roles ill-defined; "I thought you were doing it")

B. No recognition of **lack of subject matter expert** within group (The blind leading the blind)

C. **No pause** to ensure milestones met (Missing the forest for the trees, failing to periodically reevaluate progress of plan)

**eFigure 3. Example of Human Performance Deficiency (HPD) Classifier Tool**

**Human Performance Deficiency Classifier Tool**

Procedure \_\_\_\_\_

Complication \_\_\_\_\_

**Human Factor** Identified     
  **System Factor** Identified     
  **Misdiagnosis** Identified  
 **No Human Factor** Identified     
  **No System Factor** Identified     
  **NO Misdiagnosis** Identified

Error Timing (Select **All** That Apply):     
  **Pre-Op**    |     **Intra-Op**    |     **Post-Op**

**Human Factors Classification** (Select **All** That Apply): (See Reverse Page for Explanations/Examples)

**I. Planning/Problem Solving** (confirmation bias, rush to comply, false pattern matching, bias toward action)

**A. Active Mistake** (Proximate cause identifiable with near-immediate consequence)

- i. Rule based mistakes (e.g. effective protocol applied to wrong situation or applied an ineffective protocol)
- ii. Knowledge based mistakes (e.g. misunderstood disease presentation or pathophysiology; misunderstood the mechanism or contraindications of the chosen treatment; fell prey to cognitive biases)
- iii. Cognitive Bias in **Diagnosis**
  - a. Over-attachment to a Diagnosis (Anchoring/Premature Closure/Confirmation Bias)
  - b. Availability Bias (Tendency to repeat diagnoses you've seen recently)
  - c. Diagnostic Momentum (Inheriting other's conclusions without critical analysis)
- iv. Cognitive Bias in **Treatment** Decisions
  - a. Commission Bias (Bias towards beneficence, believing only active intervention can benefit)
  - b. Omission Bias (Bias to avoid maleficence, believing adverse outcomes from natural history are more favorable than those cause by physician action)

**B. Latent Mistake** (System factors or leadership decisions create a vulnerability which usually lies dormant but was exposed by "perfect storm" of previously unforeseen factors leading to adverse event)

**II. Execution Errors** (slips, lapses, fumbles, attention deficit, distraction, situational awareness)

- A. Lack of Recognition       B. Lack of Attention
- C. Memory Lapse       D. Insufficient Practice/Technical Error

**III. Rules Violation** (Conscious decision to deviate from safe operating practice, expecting adverse consequences would be avoided)

- A. Routine ("Cutting corners")
- B. Optimizing/Personal Gain (Rules interfere with personal goals)
- C. Necessary/Situational (Violation seems to offer only path available or rules seen as inappropriate to situation)
- D. Time Pressure (Something has to give in order to complete list of tasks)

**IV. Communication**

- A. Absent       B. Assumed       C. Misinterpreted

**V. Teamwork/Group Trap** (collective decision/plan is erroneous)

- A. Lack of leadership in group meeting (roles ill-defined; "I thought you were doing it")
- B. No recognition of lack of subject matter expert within group (The blind leading the blind)
- C. No pause to reevaluate if milestones are being met or situation has changed (Missing the forest for the trees)

|                                                                                                                                                                                                                                                                                                                                                                                                                                                  |                                                                                                                                         |                                                                                                          |                                                                                                                                         |                                                                                                          |
|--------------------------------------------------------------------------------------------------------------------------------------------------------------------------------------------------------------------------------------------------------------------------------------------------------------------------------------------------------------------------------------------------------------------------------------------------|-----------------------------------------------------------------------------------------------------------------------------------------|----------------------------------------------------------------------------------------------------------|-----------------------------------------------------------------------------------------------------------------------------------------|----------------------------------------------------------------------------------------------------------|
| <p><b>Narrative Description</b> (Situation, Background, Assessment, Rx/Results):</p> <p>S – _____</p> <p>B – _____</p> <p>A – _____</p> <p>R – _____</p> <p><input type="radio"/> differing assessment adjudicated by consensus (if res diff vs attending)</p> <p><input type="radio"/> Failure to Rescue (resulted in mortality/disability)</p> <p><input type="radio"/> Successful Rescue from complication/error (no morality/disability)</p> | <input type="radio"/> I<br><input type="radio"/> II<br><input type="radio"/> III<br><input type="radio"/> IV<br><input type="radio"/> V | <input type="radio"/> A<br><input type="radio"/> B<br><input type="radio"/> C<br><input type="radio"/> D | <input type="radio"/> i<br><input type="radio"/> ii<br><input type="radio"/> iii<br><input type="radio"/> iv                            | <input type="radio"/> a<br><input type="radio"/> b<br><input type="radio"/> c                            |
|                                                                                                                                                                                                                                                                                                                                                                                                                                                  | <p><b>Resident</b><br/>Primary Cause<br/>Classification<br/>(E.g. [I, A, iii, a])</p>                                                   | <p><b>Attending</b><br/>Primary Cause<br/>Classification<br/>(E.g. I, A, iii, a)</p>                     | <input type="radio"/> I<br><input type="radio"/> II<br><input type="radio"/> III<br><input type="radio"/> IV<br><input type="radio"/> V | <input type="radio"/> A<br><input type="radio"/> B<br><input type="radio"/> C<br><input type="radio"/> D |

**Avatar of human performance deficiency (HPD) Classifier Tool.** This document was used by residents and faculty surgeons in the classification and presentation of HPD events. The tool includes examples and subclassifications of HPD events.
